# Supplementary material for: Natural Cross-Kingdom Spread of Apple Scar Skin Viroid from Apple Trees to Fungi
Source: MDPI journal article supplement (doi:10.3390/cells11223686), 2022-11-20
Supplement: s1 [file s1]

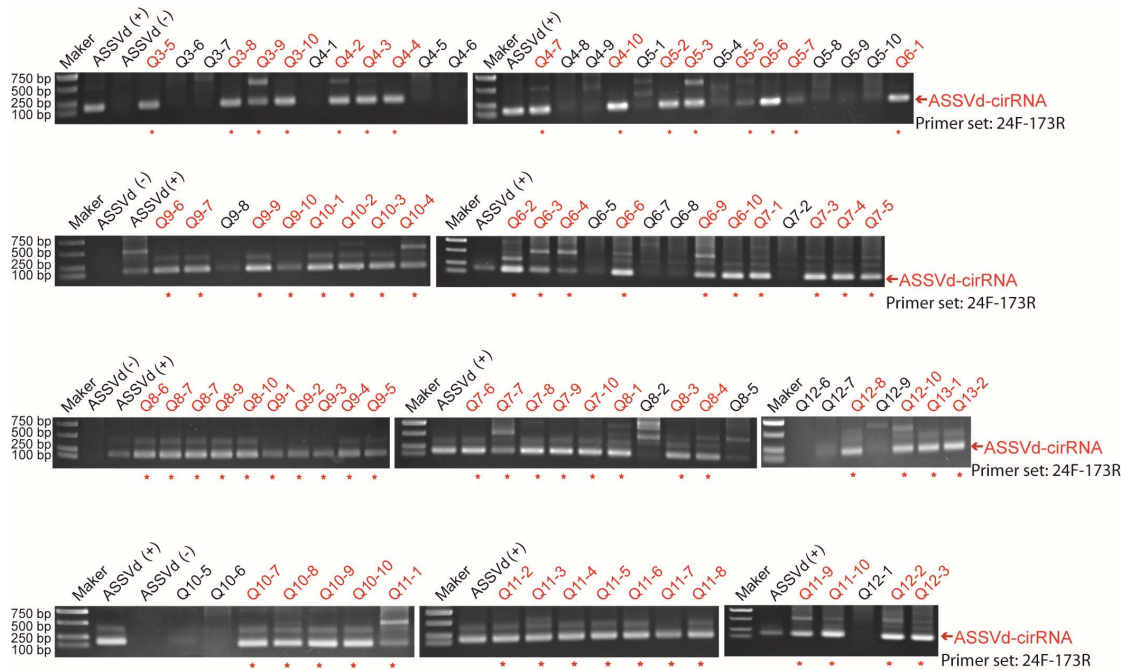

Supplementary Figure S1. Detection of ASSVd in fungal isolates by RT-PCR. A DNA ladder (Marker) was used as the size standard. ASSVd (-) and ASSVd (+) indicate the negative and positive control for the RT-PCR reaction, respectively, using RNA templates extracted from ASSVd-free and ASSVd-containing samples. RT-PCR primer sets are specific for ASSVd (Supplementary Table S1).

[illegible]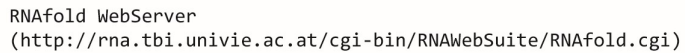

2

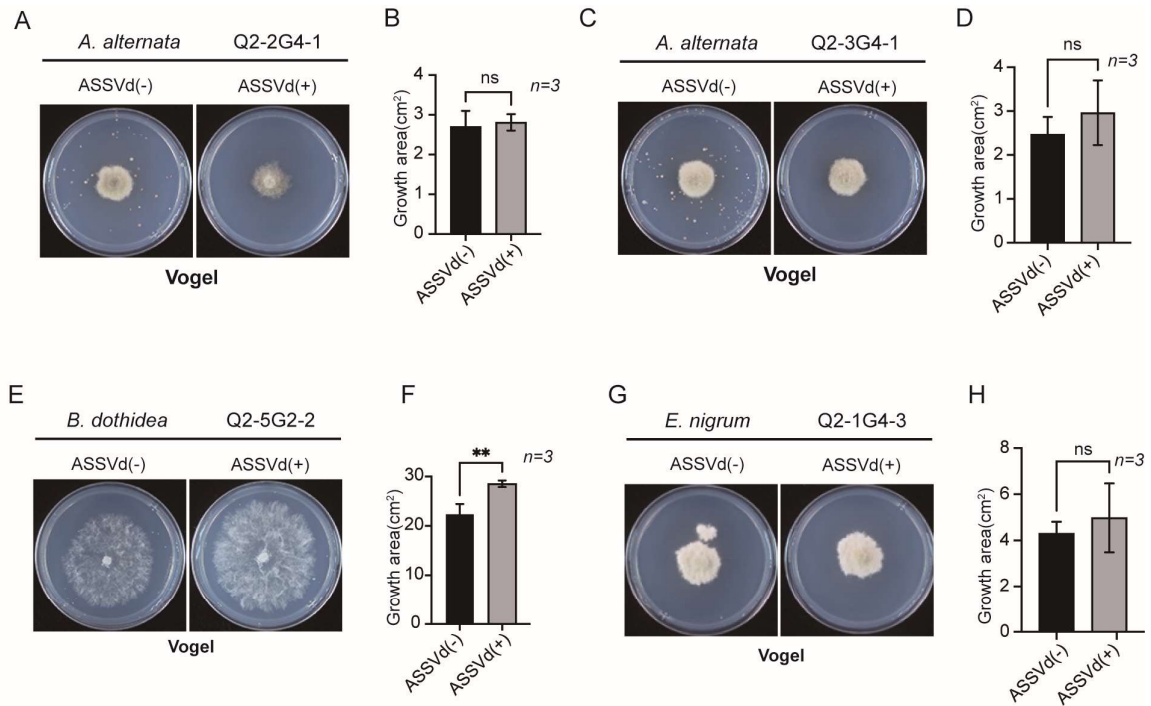

Supplementary Figure S3. The effects of ASSVd infection on fungal isolates grown on Vogel's minimal medium.

**A, C, E, and G.** Phenotypic growth of ASSVd-carrying and ASSVd-free fungal isolates. All isolates were grown on Vogel's minimal medium (6-cm plate) for 5–6 days and photographed. ASSVd (+) and ASSVd (–) indicate carrying and free isolates respectively. **B, D, F, and H.** The lesion area measured on inoculated apple leaves described in the data are presented as mean  $\pm$  SD ( $n = 3$ ). \*\* indicates a significant difference at  $p < 0.01$  (Student's  $t$ -test).

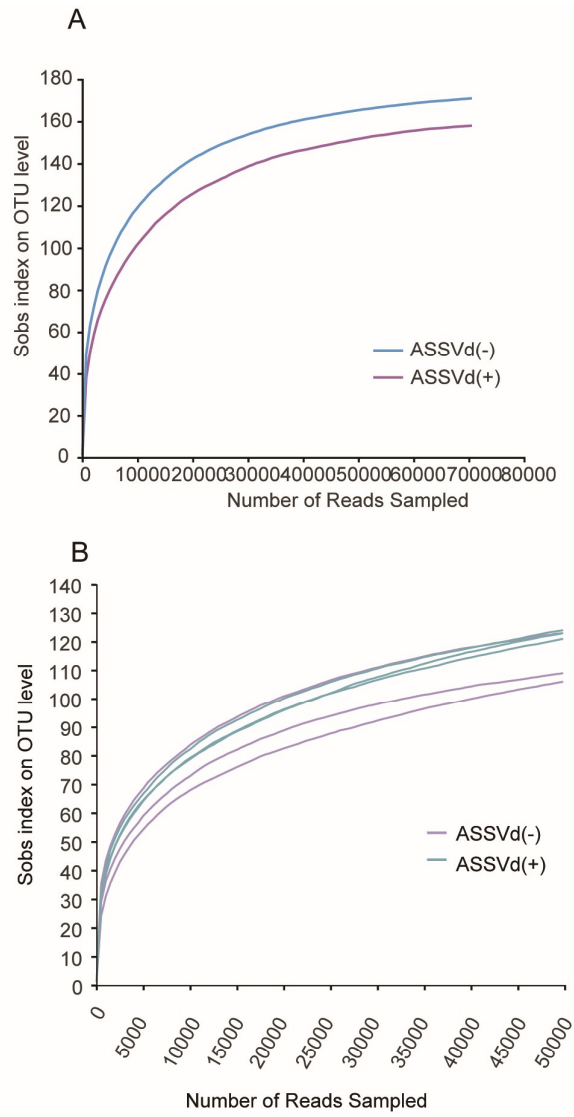

Supplementary Figure S4. The dilution curves based on the Sobs index at the OTU level.

**A.** ASSVd-infected (+) and ASSVd-free (-) samples collected in the autumn of 2019.

**B.** ASSVd-infected (+) and ASSVd-free (-) samples collected in the spring of 2020.

**Supplementary Table S1. List of primers used in this study.**

| Primer Name       | Oligonucleotide sequence (5'-3') | Size of PCR product |
|-------------------|----------------------------------|---------------------|
| F-MdEF-1 $\alpha$ | ATTCAAGTATGCCTGGGTGC             | 174 bp              |
| R-MdEF-1 $\alpha$ | CAGTCAGCCTGTGATGTTCC             |                     |
| ASSVd-1F          | CCGGCCTTCGTCGACGACGA             | 330 bp              |
| ASSVd-330R        | TGAGAAAGGAGCTGCCAGCAC            |                     |
| ASSVd-173R        | TGTTCTCTCACGCTCTTTTCTTT          | 150 bp              |
| ASSVd-24F         | GTGAGTTCCTTCTTCTCCTCGTTTT        |                     |
| ITS4R             | TCCTCCGCTTATTGATATGC             | 608 bp              |
| ITS1F             | CTTGGTCATTTAGAGGAAGTAA           | 282 bp              |
| ITS2R             | GCTGCGTTCCTTCATCGATGC            |                     |

**Supplementary Table S2. List of software and databases used for the data analysis in this study.**

| Analysis software / Database | Version number | Function                                                                                             | Link                                                                                                            |
|------------------------------|----------------|------------------------------------------------------------------------------------------------------|-----------------------------------------------------------------------------------------------------------------|
| Flash                        | 1.2.11         | Splicing paired-end sequences                                                                        | <a href="https://ccb.jhu.edu/software/FLASH/index.shtml">https://ccb.jhu.edu/software/FLASH/index.shtml</a>     |
| Qiime                        | 1.9.1          | Generating tables of abundances at each taxonomic level; calculating the distances of beta diversity | <a href="http://qiime.org/install/index.html">http://qiime.org/install/index.html</a>                           |
| Uparse                       | 7.0.1090       | OTU clustering                                                                                       | <a href="http://www.drive5.com/uparse/">http://www.drive5.com/uparse/</a>                                       |
| RDP Classifier               | 2.11           | For sequence classification annotation                                                               | <a href="https://sourceforge.net/projects/rdp-classifier/">https://sourceforge.net/projects/rdp-classifier/</a> |
| Usearch                      | 7              | OTU statistics                                                                                       | <a href="http://www.drive5.com/usearch/">http://www.drive5.com/usearch/</a>                                     |
| Mothur                       | 1.30.2         | Alpha diversity analysis                                                                             | <a href="https://www.mothur.org/wiki/Download_mothur">https://www.mothur.org/wiki/Download_mothur</a>           |
| UNITE                        | 8              | ITS database of fungal                                                                               | <a href="https://unite.ut.ee/">https://unite.ut.ee/</a>                                                         |
| FunGene                      | 9.6            | Functional gene databases                                                                            | <a href="http://www.fungene-db.fr/">http://www.fungene-db.fr/</a>                                               |
| Funguild                     | 1              | Annotation databases of fungal functional                                                            | <a href="http://www.funguild.org/">http://www.funguild.org/</a>                                                 |
| MAFFT                        | 7.2            | Multiple sequence alignment                                                                          | <a href="https://mafft.cbrc.jp/alignment/software/">https://mafft.cbrc.jp/alignment/software/</a>               |
| Fastp                        | 0.19.6         | Quality control                                                                                      | <a href="https://github.com/OpenGene/fastp">https://github.com/OpenGene/fastp</a>                               |

Information of the analysis software / database for each analysis in this paper.

**Supplementary Table S3. Summary of fungal amplicon sequencing data.**

| Collecting time         | Places / plant number | Name     | Raw reads | Trimmed Sequence reads | OTUs | Genus |
|-------------------------|-----------------------|----------|-----------|------------------------|------|-------|
| Harvesting stage (2019) | Site 1-3 /9           | ASSVd(-) | 146892    | 73446                  | 171  | 75    |
|                         | Site 1-3/9            | ASSVd(+) | 143268    | 71634                  | 158  | 74    |
| Flowering stage (2020)  | Site 1/3              | ASSVd(-) | 126006    | 63003                  | 123  | 56    |
|                         | Site 1/3              | ASSVd(+) | 100488    | 50244                  | 125  | 54    |
|                         | Site 2/3              | ASSVd(-) | 142772    | 71386                  | 106  | 47    |
|                         | Site 2/3              | ASSVd(+) | 123812    | 61906                  | 123  | 48    |
|                         | Site 3/3              | ASSVd(-) | 122600    | 61300                  | 109  | 49    |
|                         | Site 3/3              | ASSVd(+) | 141552    | 70776                  | 121  | 51    |

Supplementary Table S4. Relative abundance of the 10 most abundant fungal groups (genera) present in ASSVd-infected and ASSVd-free apple stem samples collected in the autumn of 2019.

| Fungal Genus                       | ASSVd(-) % | ASSVd(+) % |
|------------------------------------|------------|------------|
| <i>Genera in Phaeosphaeriaceae</i> | 32.69      | 8.26       |
| <i>Cladosporium</i>                | 15.43      | 22.62      |
| <i>Setomelanomma</i>               | 7.84       | 17.80      |
| <i>Pyrenochaeta</i>                | 1.01       | 22.64      |
| <i>Alternaria</i>                  | 6.30       | 16.53      |
| <i>Erythrobasidium</i>             | 10.18      | 1.03       |
| <i>Leotiomycetes</i>               | 6.97       | 0.37       |
| <i>Didymellaceae</i>               | 1.66       | 2.39       |
| <i>Neosetophoma</i>                | 3.34       | 0.43       |
| <i>Filobasidium</i>                | 0.82       | 1.93       |
| Others                             | 13.76      | 6.00       |

Supplementary Table S5. Relative abundance of the 10 most abundant fungal groups (genera) present in ASSVd-infected and ASSVd-free apple stem samples collected in the spring of 2020.

| Fungal Genus                       | Site 1       |              | Site 2      |              | Site 3      |              |
|------------------------------------|--------------|--------------|-------------|--------------|-------------|--------------|
|                                    | ASSVd(-) %   | ASSVd(+) %   | ASSVd(-) %  | ASSVd(+) %   | ASSVd(-) %  | ASSVd(+) %   |
| <i>Genera in Phaeosphaeriaceae</i> | 17.39        | 44.68        | 64.76       | 61.59        | 49.39       | 50.7         |
| <i>Alternaria</i>                  | <b>12.85</b> | <b>22.67</b> | <b>3.02</b> | <b>11.65</b> | <b>6.67</b> | <b>11.88</b> |
| <i>Genera in Pleosporales</i>      | 24.64        | 9.42         | 12.23       | 2.3          | 0.31        | 6.73         |
| <i>Cladosporium</i>                | 13.56        | 7.95         | 1.52        | 10.58        | 3.14        | 4.538        |
| <i>Genera in Didymellaceae</i>     | 4.13         | 5.55         | 11.16       | 0.61         | 8.87        | 10.76        |
| <i>Setophoma</i>                   | 1.64         | 0.62         | 0.04        | 2.34         | 12.36       | 1.04         |
| <i>Erythrobasidium</i>             | <b>4.03</b>  | <b>2.53</b>  | <b>2.68</b> | <b>1.98</b>  | <b>1.92</b> | <b>1.03</b>  |
| <i>Chaetosphaeronema</i>           | <b>5.31</b>  | <b>0.41</b>  | <b>0.39</b> | <b>0.21</b>  | <b>5.80</b> | <b>0.06</b>  |
| <i>Vishniacozyma</i>               | 0.52         | 0.46         | 0.25        | 1.05         | 7.06        | 0.95         |
| <i>Pyrenochaeta</i>                | 0.18         | 0.49         | 0.24        | 0.02         | 0.04        | 6.67         |
| Others                             | 15.75        | 5.22         | 3.71        | 7.67         | 4.44        | 5.642        |
